# Supplementary material for: Metabolic Rewiring and Altered Glial Differentiation in an iPSC-Derived Astrocyte Model Derived from a Nonketotic Hyperglycinemia Patient
Source: MDPI journal article supplement (doi:10.3390/ijms25052814), 2024-02-28
Supplement: s1 [file s1]

**Table S1: Primers sequence**

| Gene         | Genbank Ref. | Protein Name                      | Sequence 5'-3'                                  |
|--------------|--------------|-----------------------------------|-------------------------------------------------|
| <i>GLDC</i>  | NM_000170.3  | Glycine decarboxylase             | TGGCATGGGCTATTATAACT<br>GTATGGAGTATACTGGGTGATCC |
| <i>GCSH</i>  | NM_004483.5  | Glycine cleavage system protein H | GCATTGGAACAGTGGGAAT<br>CCAACTTCAGGGAGACTACAATA  |
| <i>AMT</i>   | NM_000481.4  | Aminomethyltransferase            | AGGAGGTGCTCCGCAGGA<br>GCAGCATATGAGACACGTCAAAG   |
| <i>PHGDH</i> | NM_006623.4  | Phosphoglycerate dehydrogenase    | CAGCACCAAGGAGGCTCA<br>CAGCAATTCCTCCCCACA        |
| <i>PSAT1</i> | NM_058179.4  | Phosphoserine aminotransferase 1  | AGTGGAGCCCCAAAATAGAA<br>CCTATGCCCTTTCAAGGAC     |
| <i>PSPH</i>  | NM_004577.4  | Phosphoserine phosphatase         | AGGAAGCTTTTCTACTCAGCA<br>GAGTCTCTGCACCTGCTC     |
| <i>SHMT1</i> | NM_004169.5  | Serine hydroxymethyltransferase 1 | GACTGAGTTTATTGATGAACTGG<br>CCTGAGTAGGGCTGGAC    |
| <i>SHMT2</i> | NM_005412.6  | Serine hydroxymethyltransferase 2 | TCAGCCACGTCCATCTTCT<br>CAGTGCCAGCTGGTTGTAGT     |
| <i>SRR</i>   | NM_021947.3  | Serine racemase                   | GCAATACAAGCCTACGGAGC<br>GGCAATTGTCCCTTGTCCAG    |

### Folate Cycle

| Gene          | Genbank Ref. | Protein Name                              | Sequence 5'-3'                                       |
|---------------|--------------|-------------------------------------------|------------------------------------------------------|
| <i>MTHFD1</i> | NM_005956.4  | Methylenetetrahydrofolate dehydrogenase 1 | TTGGACAGGCTCCAACGGAGAA<br>AGAAGTGGTGAGAGCCAGGACA     |
| <i>MTHFD2</i> | NM_006636.4  | Methylenetetrahydrofolate dehydrogenase 2 | CTCCTTGTTTCAGTTGCCTCTTCC<br>CTGATCCAAACACATTCGTCCTAC |
| <i>MTHFR</i>  | NM_005957.5  | Methylenetetrahydrofolate reductase       | AGATGGCTACCACAGAGGTGCT<br>TGGGACGTACATCTTCCTCTCG     |
| <i>DHFR</i>   | NM_000791.4  | Dihydrofolate reductase                   | CATGGTCTGGATAGTTGGTGGC<br>GTGTCACCTTTCAAAGTCTTGCATG  |
| <i>TYMS</i>   | NM_001071.4  | Thymidylate synthetase                    | GGTGTTTTGGAGGAGTTGCTGTG<br>GGAGAATCCCAGGCTGTCCAAA    |

### Creatine Cycle

| Gene        | Genbank Ref. | Protein Name               | Sequence 5'-3'                                 |
|-------------|--------------|----------------------------|------------------------------------------------|
| <i>AGAT</i> | NM_001482.3  | Glycine amidinotransferase | CCCACCACCTGTTCCCGGC<br>GCATATATCACAATGTTGAGATG |

## mtDNA Depletion

| Gene                 | Genbank Ref. | Protein Name                     | Sequence 5'-3'                                   |
|----------------------|--------------|----------------------------------|--------------------------------------------------|
| <i>ND1</i>           | NM_173708.1  | NADH dehydrogenase 1             | GGCTATATACTACGCAAAGGC<br>GGTAGATGTGGCGGGTTTATAGG |
| <i>12S (MT-RNR1)</i> | NC_012920.1  | Mitochondrially encoded 12S rRNA | TGGCCACAGCACTTAAACAC<br>TGGTTAGGCTGGTGTATAGGG    |
| <i>18S</i>           | NR_003286    | Mitochondrially encoded 18S rRNA | ATCCATTGGAGGGCAAGTC<br>GCTCCCAAGATCCAATACG       |

## Cell Cycle

| Gene         | Genbank Ref. | Protein Name              | Sequence 5'-3'                                    |
|--------------|--------------|---------------------------|---------------------------------------------------|
| <i>CCNA2</i> | NM_001237.5  | Cyclin A2                 | CTCTACACAGTCACGGGACAAAG<br>CTGTGGTGCTTTGAGGTAGGTC |
| <i>CCND1</i> | NM_053056.3  | Cyclin D1                 | TCTACACCGACAATCCATCCG<br>TCTGGCATTTTGGAGAGGAAGTG  |
| <i>CDK1</i>  | NM_001786.5  | Cyclin-dependent kinase 1 | GGAAACCAGGAAGCCTAGCATC<br>GGATGATTCAGTGCCATTTTGCC |
| <i>CDK2</i>  | NM_001798.5  | Cyclin-dependent kinase 2 | ATGGATGCCTCTGCTCTCACTG<br>CCCGATGAGAATGGCAGAAAGC  |

### NPCs Characterization

| Gene          | Genbank Ref.   | Protein Name                     | Sequence 5'-3'                                       |
|---------------|----------------|----------------------------------|------------------------------------------------------|
| <i>LIN28B</i> | NM_024674.6    | Lin-28 homolog B                 | GGCATCTGTAAGTGGTTCAACG<br>CCTCCTTCAAGCTCCGGA         |
| <i>OCT3/4</i> | NM_001173531.3 | POU class 5 homeobox 1           | AGTTTGTGCCAGGGTTTTTG<br>ACTTCACCTTCCCTCCAACC         |
| <i>PAX6</i>   | NM_001368894.2 | Paired box 6                     | AATAACCTGCCTATGCAACCC<br>AACTTGAACTGGAAGTACACAC      |
| <i>NES</i>    | NM_006617.2    | Nestin                           | TGGCAAAGGAGCCTACTCCAAGAA<br>ATCGGGATTGAGCTGACTTAGCCT |
| <i>SOX1</i>   | NM_005986.3    | SRY-box transcription factor 1   | ATGCACCGCTACGACATGG<br>CTCATGTAGCCCTGCGAGTTG         |
| <i>MAP2</i>   | NM_001375505.1 | Microtubule-associated protein 2 | AAAGCTGATGAGGGCAAGAA<br>GGCCCCTGAATAAATTCCAT         |
| <i>FOXP1</i>  | NM_005249.5    | Forkhead box G1                  | TACTACCGCGAGAACAAGCA<br>TCACGAAGCACTTGTTGAGG         |

### iAs Characterization

| Gene         | Genbank Ref. | Protein Name                   | Sequence 5'-3'                               |
|--------------|--------------|--------------------------------|----------------------------------------------|
| <i>S100β</i> | NM_006272.3  | S100 calcium binding protein B | TGTAGACCCTAACCCGGAGG<br>TGCATGGATGAGGAACGCAT |

|                |                |                                           |                                                  |
|----------------|----------------|-------------------------------------------|--------------------------------------------------|
| <i>GFAP</i>    | NM_002055.5    | Glial fibrillary acidic protein           | GTCCCCCACCTAGTTTGCAG<br>TAGTCGTTGGCTTCGTGCTT     |
| <i>VIM</i>     | NM_003380.5    | Vimentin                                  | TGGACCAGCTAACCAACGAC<br>GCCAGAGACGCATTGTCAAC     |
| <i>ALDH1L1</i> | NM_001270364.2 | Aldehyde dehydrogenase 1 family member L1 | GGATGCCTTTGAGAATGGACGG<br>TCCTGGTGCTGCTCCATGAGAT |
| <i>AQP4</i>    | NM_001317384.3 | Aquaporin 4                               | GCCATCATTGGAGCAGGAATCC<br>ACTCAACCAGGAGACCATGACC |
| <i>APOE</i>    | NM_000041.4    | Apolipoprotein E                          | GGGTCGCTTTTGGGATTACCTG<br>CAACTCCTTCATGGTCTCGTCC |
| <i>GLAST</i>   | NM_001166695.3 | Solute carrier family 1 member 3          | TAAAGTGCCCATCCAGGC<br>AAGACAACCTAGACCCAGGGC      |
| <i>GLT-1</i>   | NM_006516.4    | Solute carrier family 2 member 1          | CATGGGCTTCTCGAAACTG<br>AAGGGCTGTGGGTGACAC        |
| <i>MAP2</i>    | NM_001375505.1 | Microtubule associated protein 2          | AAAGCTGATGAGGGCAAGAA<br>GGCCCCTGAATAAATTCCAT     |
| <i>NeuN</i>    | NM_001350451.2 | RNA binding fox-1 homolog 3               | TACGCAGCCTACAGATACGCTC<br>TGGTTCCAATGCTGTAGGTCGC |

### iAs Metabolism

| Gene         | Genbank Ref.   | Protein Name                     | Sequence 5'-3'                                   |
|--------------|----------------|----------------------------------|--------------------------------------------------|
| <i>GLYT1</i> | NM_001024845.3 | Solute carrier family 6 member 9 | GTCACAGCCATTGTGGATGAGG<br>GCCGCATAGTTGTCCATCAGCA |

|              |             |                                  |                                                    |
|--------------|-------------|----------------------------------|----------------------------------------------------|
| <i>GLYT2</i> | NM_004211.5 | Solute carrier family 6 member 5 | CTGATGCTCCTCACTCTTGGAC<br>TGC GTAGGTACTTGGGAAACTCG |
|--------------|-------------|----------------------------------|----------------------------------------------------|

### Endogenous Control

| Gene         | Genbank Ref. | Protein Name | Sequence 5'-3'                                 |
|--------------|--------------|--------------|------------------------------------------------|
| <i>ACTB</i>  | NM_001101.5  | Actin beta   | GGCATGGGTCAGAAGGATTC<br>CACAGCGAGCTCATTGTAGAAG |
| <i>TUBB1</i> | NM_030773.4  | Tubulin beta | CTTTGTGGAATGGATCCCCA<br>GACTGCCATCTTGAGGCCA    |
