# Supplementary material for: Metabolic Rewiring and Altered Glial Differentiation in an iPSC-Derived Astrocyte Model Derived from a Nonketotic Hyperglycinemia Patient
Source: MDPI journal article supplement (doi:10.3390/ijms25052814), 2024-02-28
Supplement: s1 [file s1]

**Table S2: Antibodies**

| <b>Antibody</b>                        | <b>Protein</b>                                        | <b>Host</b> | <b>Use</b>                 | <b>Reference</b> | <b>Company</b>           |
|----------------------------------------|-------------------------------------------------------|-------------|----------------------------|------------------|--------------------------|
| <b>Anti-AGAT</b>                       | Glycine amidinotransferase                            | Rabbit, pAb | WB (1:1000)                | 12801-1-AP       | Proteintech              |
| <b>Anti-CV-ATP5<math>\alpha</math></b> | ATP synthase alfa subunit                             | Mouse, mAb  | WB (1:1000)<br>IF (1:500)  | ab14748          | Abcam                    |
| <b>Anti-GAPDH</b>                      | Glyceraldehyde-3-phosphate dehydrogenase              | Mouse, mAb  | WB (1:5000)                | ab8245           | Abcam                    |
| <b>Anti-GCSH</b>                       | Glycine cleavage system protein H                     | Rabbit, pAb | WB (1:1000);<br>IF (1:500) | 16726-1-AP       | Proteintech              |
| <b>Anti-GCSP</b>                       | Glycine decarboxylase                                 | Mouse, pAb  | WB (1:2000)<br>IF (1:200)  | NBP1-32907       | Novus Biological         |
| <b>Anti-GCST</b>                       | Aminomethyltransferase                                | Mouse, pAb  | WB (1:500)                 | NBP1-89783       | Novus Biological         |
| <b>Anti-GFAP</b>                       | Glial fibrillary acidic protein                       | Mouse, mAb  | IF (1:50)                  | 3670S            | Cell Signalling          |
| <b>Anti-GLAST1</b>                     | Solute carrier family 1 member 3                      | Rat, pAb    | IF (1:40)                  | -                | -                        |
| <b>Anti-GLT-1</b>                      | Solute carrier family 2 member 1                      | Rat, pAb    | IF (1:40)                  | -                | -                        |
| <b>Anti-MAP2</b>                       | Microtubule-associated protein 2                      | Mouse, mAb  | IF (1:100)                 | M1406            | Sigma Aldrich            |
| <b>Anti-Nestin</b>                     | Nestin                                                | Mouse, mAb  | IF (1:100)                 | ab18102          | Abcam                    |
| <b>Anti-OCT3/4</b>                     | POU class 5 homeobox 1                                | Mouse, mAb  | IF 1:60                    | sc-5279          | Santa Cruz Biotechnology |
| <b>Anti-OxPhos</b>                     | CI-NDUFB8, CII-SDHB, CIII-UQCRC1, CIV-MTCOI, CV-ATP5A | Mouse, mAb  | WB (1:500)                 | ab110413         | Abcam                    |

|                   |                                   |             |             |            |             |
|-------------------|-----------------------------------|-------------|-------------|------------|-------------|
| <b>Anti-PAX6</b>  | Paired box 6 protein              | Rabbit, pAb | IF (1:100)  | GTX113241  | GeneTex     |
| <b>Anti-PHGDH</b> | Phosphoglycerate dehydrogenase    | Rabbit, pAb | WB (1:1000) | 14719-1-AP | Proteintech |
| <b>Anti-PSAT1</b> | Phosphoserine aminotransferase 1  | Rabbit, pAb | WB (1:1000) | 10501-1-AP | Proteintech |
| <b>Anti-PSPH</b>  | Phosphoserine phosphatase         | Rabbit, pAb | WB (1:1000) | 14513-1-AP | Proteintech |
| <b>Anti-S100β</b> | S100 calcium-binding protein β    | Rabbit, mAb | IF (1:50)   | ab52642    | Abcam       |
| <b>Anti-SHMT1</b> | Serine hydroxymethyltransferase 1 | Rabbit, pAb | WB (1:1000) | 14149-1-AP | Proteintech |
| <b>Anti-SHMT2</b> | Serine hydroxymethyltransferase 2 | Rabbit, pAb | WB (1:1000) | 11099-1-AP | Proteintech |
| <b>Anti-SRR</b>   | Serine racemase                   | Rabbit, pAb | WB (1:1000) | 17955-1-AP | Proteintech |

### Secondary Antibodies

| Antibody                         | Protein    | Host   | Use                | Reference | Company         |
|----------------------------------|------------|--------|--------------------|-----------|-----------------|
| <b>Alexa 488 Anti-rabbit-IgG</b> | Rabbit IgG | Donkey | IF 1:500           | A-21206   | ThermoFisher    |
| <b>Alexa 555 Anti-mouse-IgG</b>  | Mouse IgG  | Donkey | IF 1:500           | A-31570   | ThermoFisher    |
| <b>Anti-rabbit-IgG-HRP</b>       | Rabbit IgG | Goat   | WB, BN-WB (1:5000) | 7074S     | Cell Signalling |
| <b>Anti-mouse-IgG-HRP</b>        | Mouse IgG  | Horse  | WB, BN-WB (1:2000) | 7076S     | Cell Signalling |

**WB:** Western blot; **IF:** Immunofluorescence; **BN-WB:** Blue Native Western blot; **pAb:** Polyclonal antibody; **mAb:** Monoclonal antibody
